# Supplementary material
Source: PubMed Central journal article supplement (PMC2935847)
Supplement: NIHMS227857-supplement-01.pdf [file NIHMS227857-supplement-01.pdf]

Supplement 1

Supplemental Figure 1. Flow chart of events in single-dose and repeated-dose studies

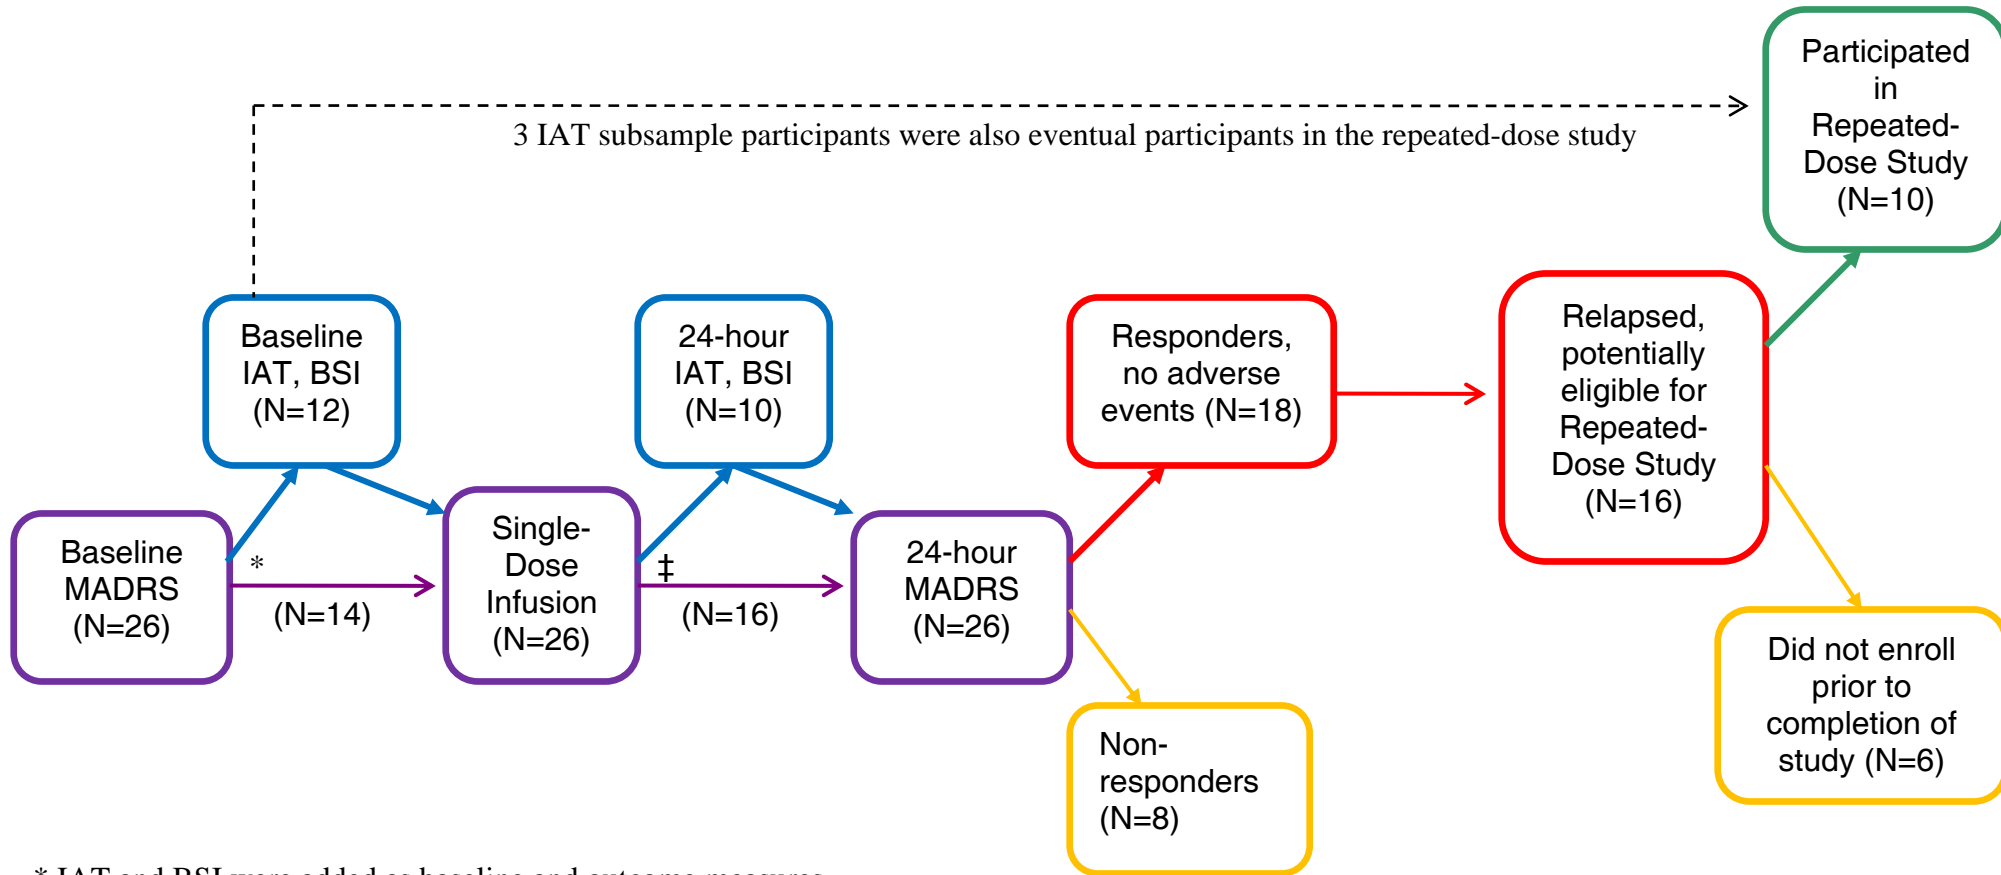

\* IAT and BSI were added as baseline and outcome measures during latter half of study enrollment period.

‡ Time constraints prevented post-infusion IAT and BSI data collection in 2 of the 12 patients who completed all measures at baseline.
